# Supplementary material for: Utilization and Spending on Mental Health Services Among Children and Youths With Commercial Insurance
Source: PubMed Central journal article supplement (PMC10548294; doi:10.1001/jamanetworkopen.2023.36979), 2023-10-03
Supplement: jamanetwopen-e2336979-s002.pdf [file jamanetwopen-e2336979-s002.pdf]

## **Data Sharing Statement**

Kalmin. Utilization and Spending on Mental Health Services Among Children and Youths With Commercial Insurance, 2019-2022. *JAMA Netw Open*. Published October 03, 2023.  
doi:10.1001/jamanetworkopen.2023.36979

### **Data**

**Data available:** No
